# Supplementary material for: The Amount of Cross-Linker Influences Affinity and Selectivity of NanoMIPs Prepared by Solid-Phase Polymerization Synthesis
Source: MDPI journal article supplement (doi:10.3390/polym16040532), 2024-02-16
Supplement: s1 [file s1]

## Supplementary Materials

**Figure S1:** binding isotherm of rIgG to non-imprinted linear polymer (BIS = 0%)

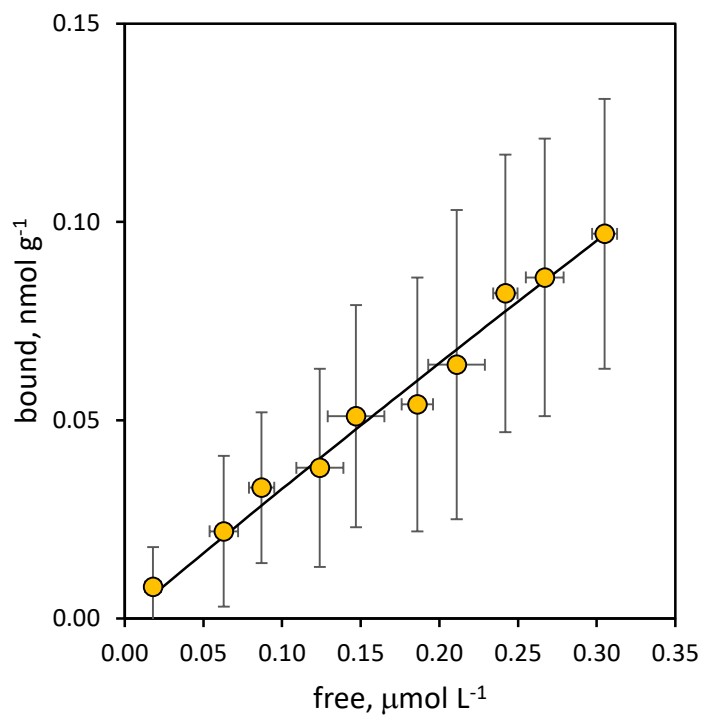

n = 10 (mean of 3 replicates)

correlation coefficient (adjusted for degree of freedom):  $r^2 = 0.981$

fit standard error: 0.00379

fit F-value: 520.4

$B_{\text{max}}$ :  $2.27 \pm 5.20 \text{ nmol g}^{-1}$  ( $t = 0.436$ ;  $P > t$  0.674)

$K_{\text{eq}}$ :  $0.15 \pm 0.35 \times 10^6 \text{ L mol}^{-1}$  ( $t = 0.422$ ;  $P > t$  0.684)
